# Supplementary material for: Synthesis and characterization of the first transparent silicon oxycarbide aerogel obtained through H2decarbonization
Source: Royal Society of Chemistry journal article supplement (doi:10.1039/c5ta06669g), 2015-01-01
Supplement: c5ta06669g1.pdf [file c5ta06669g1.pdf]

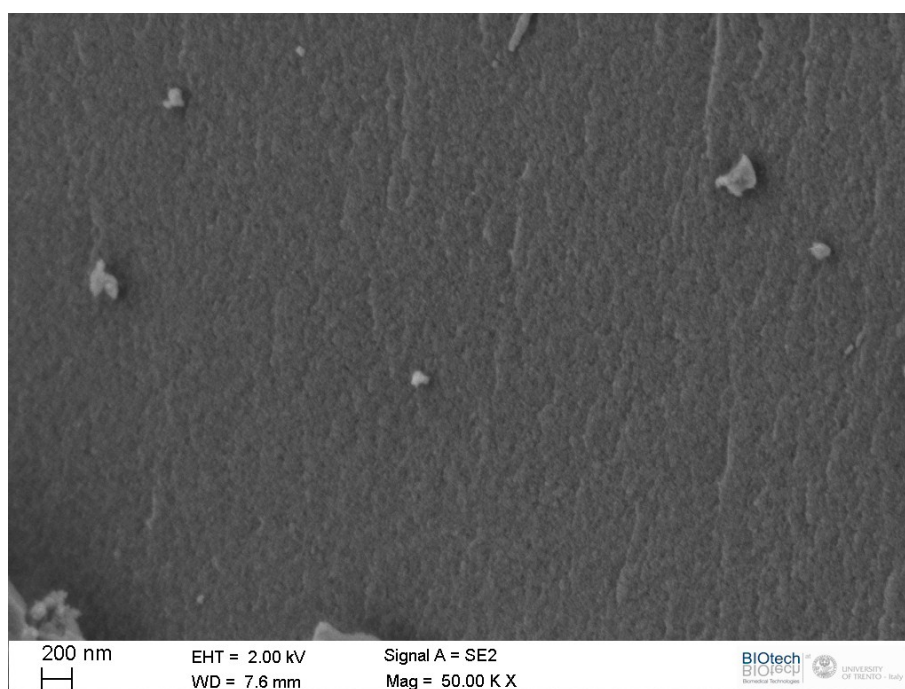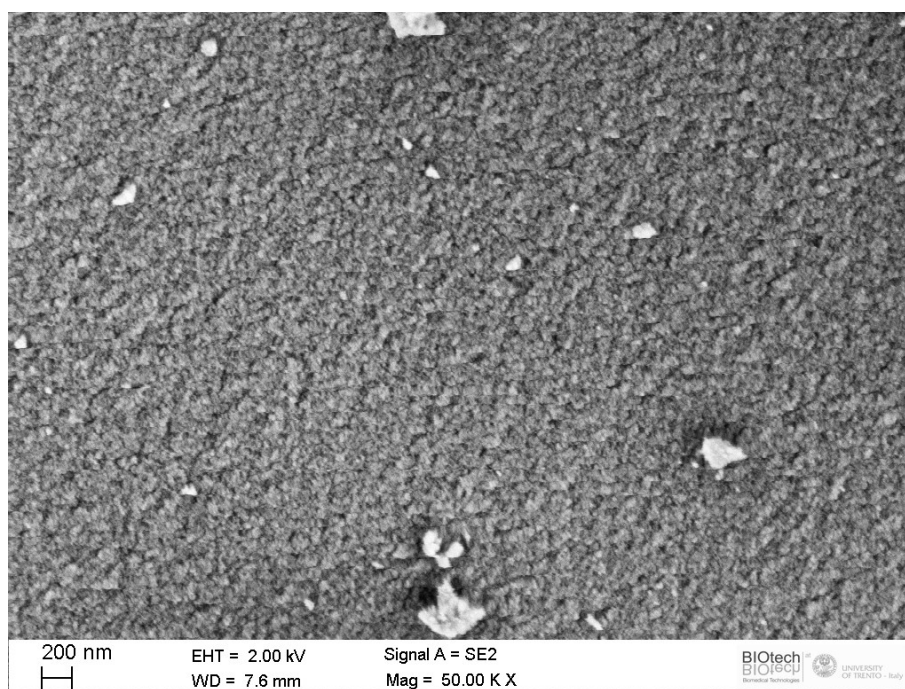

**Figure S1.** FE-SEM pictures of the fracture surface of BTEM (top) and BTEE (bottom) SiCO aerogels pyrolyzed at 800°C.
